# Supplementary material for: Ultrafine Jujube Powder Enhances the Infiltration of Immune Cells during Anti-PD-L1 Treatment against Murine Colon Adenocarcinoma
Source: MDPI journal article supplement (doi:10.3390/cancers13163987), 2021-08-07
Supplement: s1 [file s1]

## Supplementary Materials:

**Table S1.** Physicochemical properties of P, S1, S2 and S3

| Samples | Angle of repose /° | Bulk density /g·cm <sup>-3</sup> | Water holding capacity (%) | Swelling ratio(mL/g) | Solubility (%) | Moisture absorption (%) | Surface area (m <sup>2</sup> /g) |
|---------|--------------------|----------------------------------|----------------------------|----------------------|----------------|-------------------------|----------------------------------|
| P       | 20.70 ± 0.82       | 0.58 ± 0.06                      | 104.39 ± 1.56              | 4 ± 0.18             | 40.23 ± 1.23   | 28.54 ± 1.01            | 0.98 ± 0.02                      |
| S1      | 37.48 ± 0.23       | 0.55 ± 0.03                      | 97.15 ± 1.89               | 4.5 ± 0.23           | 48.52 ± 1.87   | 30.87 ± 0.98            | 1.39 ± 0.03                      |
| S2      | 46.08 ± 0.67       | 0.47 ± 0.02                      | 85.44 ± 1.19               | 5.25 ± 0.76          | 52.31 ± 0.99   | 33.48 ± 0.86            | 2.11 ± 0.09                      |
| S3      | 48.81 ± 0.85       | 0.47 ± 0.01                      | 84.13 ± 0.84               | 5.5 ± 0.54           | 59.37 ± 1.46   | 35.93 ± 0.24            | 3.35 ± 0.06                      |

**Table S2.** Effects of ultrafine grinding on the contents of dietary fiber in JP

| Samples | TDF (%)      | IDF (%)      | SDF (%)     | IDF/SDF     |
|---------|--------------|--------------|-------------|-------------|
| P       | 20.50 ± 0.98 | 17.83 ± 0.15 | 2.68 ± 0.06 | 6.66 ± 0.54 |
| S1      | 20.46 ± 0.78 | 17.42 ± 0.28 | 3.04 ± 0.12 | 5.72 ± 0.18 |
| S2      | 20.08 ± 0.16 | 15.35 ± 0.25 | 4.73 ± 0.08 | 3.24 ± 0.64 |
| S3      | 20.97 ± 0.83 | 15.91 ± 0.68 | 5.06 ± 0.34 | 3.14 ± 0.46 |

Note: TDF, total dietary fiber; IDF, insoluble dietary fiber; SDF, soluble dietary fiber.

**Table S3.** Tumor volume (mm<sup>3</sup>)

| Groups    | Day 5          | Day 7          | Day 11         | Day 14         | Day 18          | Day 22          | Day 25           |
|-----------|----------------|----------------|----------------|----------------|-----------------|-----------------|------------------|
| Control   | 101.62 ± 28.25 | 173.94 ± 10.76 | 296.74 ± 37.71 | 382.24 ± 27.43 | 545.79 ± 78.75  | 984.05 ± 115.49 | 1393.79 ± 172.64 |
| αPD-L1    | 99.99 ± 20.15  | 168.54 ± 20.22 | 190.43 ± 41.48 | 297.58 ± 73.39 | 441.90 ± 122.85 | 559.37 ± 192.51 | 641.51 ± 219.46  |
| αPD-L1+P  | 97.75 ± 20.21  | 161.13 ± 18.26 | 176.65 ± 28.12 | 233.90 ± 33.56 | 256.62 ± 36.42  | 355.08 ± 55.50  | 430.53 ± 74.41   |
| αPD-L1+S1 | 96.56 ± 11.35  | 155.21 ± 19.64 | 160.91 ± 29.08 | 185.09 ± 41.33 | 221.53 ± 56.76  | 256.17 ± 81.50  | 374.15 ± 94.29   |
| αPD-L1+S2 | 97.12 ± 13.19  | 154.46 ± 14.95 | 165.51 ± 22.91 | 180.91 ± 35.76 | 229.50 ± 50.51  | 271.91 ± 85.50  | 328.73 ± 95.10   |
| αPD-L1+S3 | 94.69 ± 9.99   | 155.67 ± 35.05 | 158.80 ± 15.53 | 171.06 ± 31.64 | 215.14 ± 51.61  | 228.55 ± 73.56  | 255.89 ± 76.71   |

**Table S4.** jujube powder's microbial purity

| Test items                           | Test method                     | Test results |
|--------------------------------------|---------------------------------|--------------|
| Total plate count, CFU/g             | GB 4789.2-2016                  | <10          |
| <i>Escherichia coli</i> , CFU/g      | GB 4789.38-2012                 | <10          |
| <i>Salmonella</i> , /25g             | GB 4789.4-2016                  | Non-Detected |
| <i>Staphylococcus aureus</i> , CFU/g | GB 4789.10-2016                 | <10          |
| <i>Clostridium</i> , /g              | GB/T4789.12-2003<br>USP 43 <62> | Non-Detected |

**Microbiological detection of jujube powder:** According to the National Food Safety Standard GB 4789.2-2016, we applied plate colony counting medium (PCA) to determine the contents of total plate count in jujube powders. The most probable number (MPN) counting method was applied to determine the contents of *Escherichia coli* according to GB 4789.3-2012. Biochemical reaction-serological identification was used to determine the contents of *Salmonella* according to GB 4789.4-2016. Baird-Parker PCA method was used to determine the contents of *Staphylococcus aureus* according to GB 4789.10-2016. Biochemical reaction-serological identification was used to determine the contents of *Clostridium* according to GB/T4789.12-2003 and USP 43 <62>. Briefly, 25g samples were added to distilled water for homogenization. The mixture was diluted 10 times and 2-3 appropriate dilutions were picked up for culture. Then, 1 mL of appropriate dilutions were added into the different flat plates and cultured at 25-28 °C for 7 days. Finally, colony count was used to indicate microbial purity of jujube powder.”

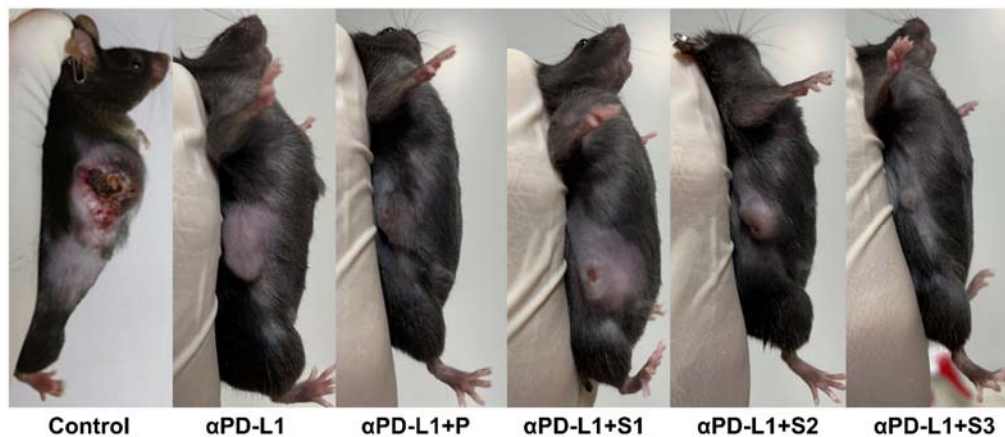

**Figure S1.** Picture of tumor-bearing mice among different groups.

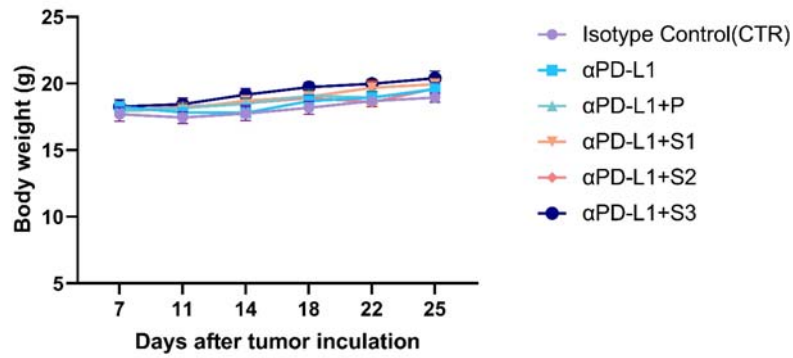

Figure S2. Body weight were measured twice weekly (n = 6).

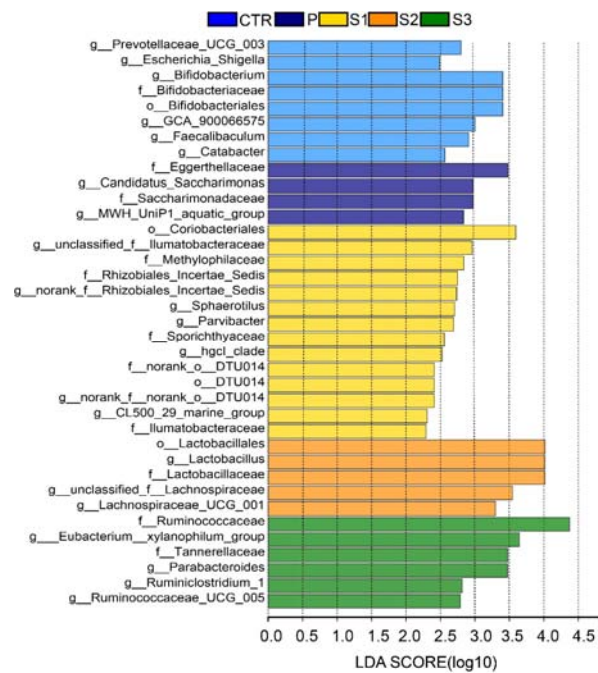

Figure S3. LDA Score of LefSe analysis.
